# Supplementary material for: Optimized DNA-based biosensor for monitoringLeishmania infantumin human plasma samples using biomacromolecular interaction: a novel platform for infectious disease diagnosis
Source: Royal Society of Chemistry journal article supplement (doi:10.1039/d0ay01516d), 2020-01-01
Supplement: d0ay01516d1.pdf [file d0ay01516d1.pdf]

## Supporting information

### **Optimized DNA based biosensor for *Leishmania spp.* monitoring in human plasma samples using biomacromolecules interaction: A novel platform for infectious disease diagnosis**

Fatemeh Farshchi <sup>a, b, 1</sup>, Arezoo Saadati <sup>a, 1</sup>, Mohammad Hasanzadeh <sup>a, \*</sup>

<sup>a</sup> Pharmaceutical Analysis Research Center, Tabriz University of Medical Sciences, Tabriz, Iran.

<sup>b</sup> Food and Drug Safety Research Center, Tabriz University of Medical Sciences, Tabriz, Iran.

<sup>c</sup> Nutrition Research Center, Tabriz University of Medical Sciences, Tabriz, Iran.

Corresponding Author

E-mail address: [mhmmmd\\_hasanzadeh@yahoo.com](mailto:mhmmmd_hasanzadeh@yahoo.com), [hasanzadehm@tbzmed.ac.ir](mailto:hasanzadehm@tbzmed.ac.ir)

<sup>c</sup> Pharmaceutical Analysis Research Center, Tabriz University of Medical Sciences, Tabriz, Iran

Tel: +98(41) 33363311; Fax: +98(41)33363231

<sup>1</sup> Co-First Author

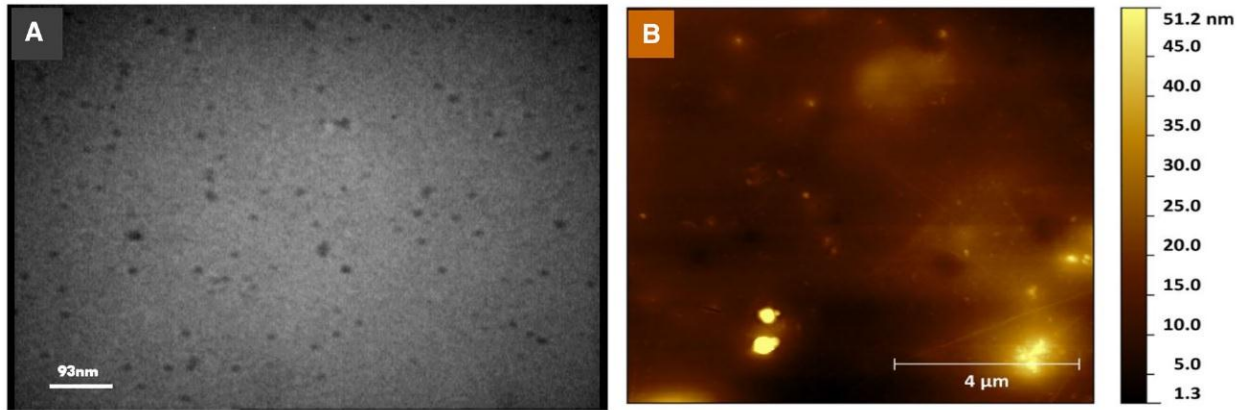

Fig. S1. A) TEM and B) FEM images of GQDs.

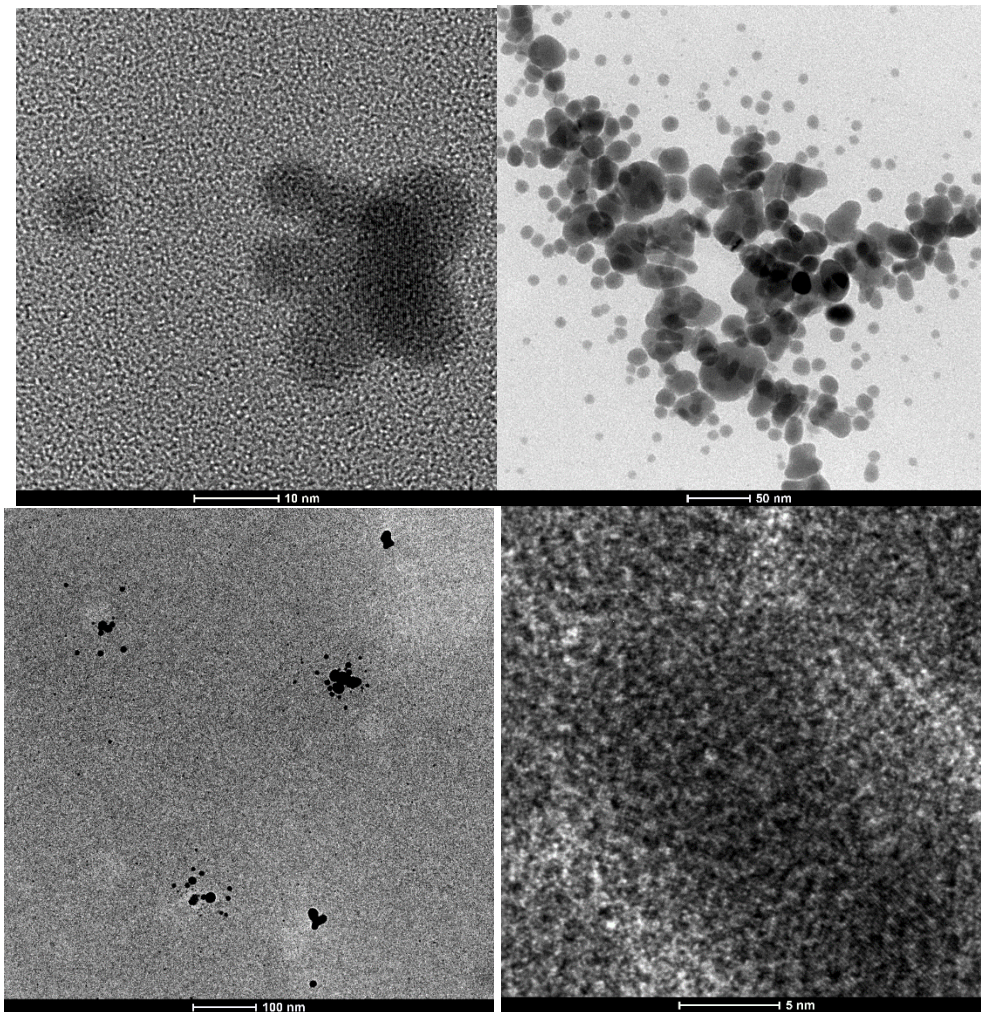

Fig. S2: TEM images of AgNPs in different magnification.

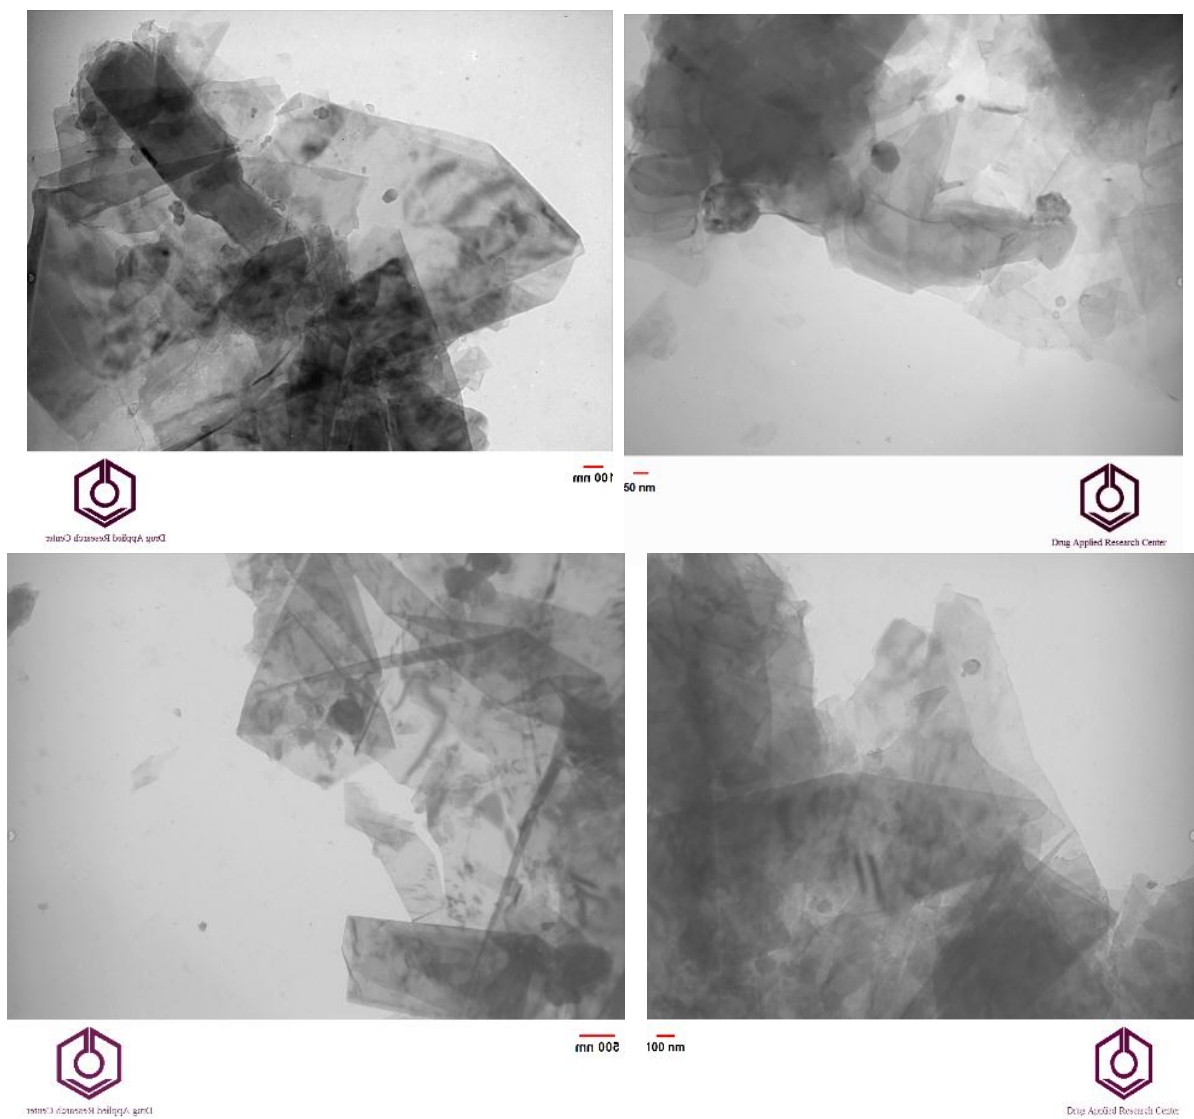

**Fig.S3.** TEM images of the bulk Ag NPr /GQDs nano-ink.

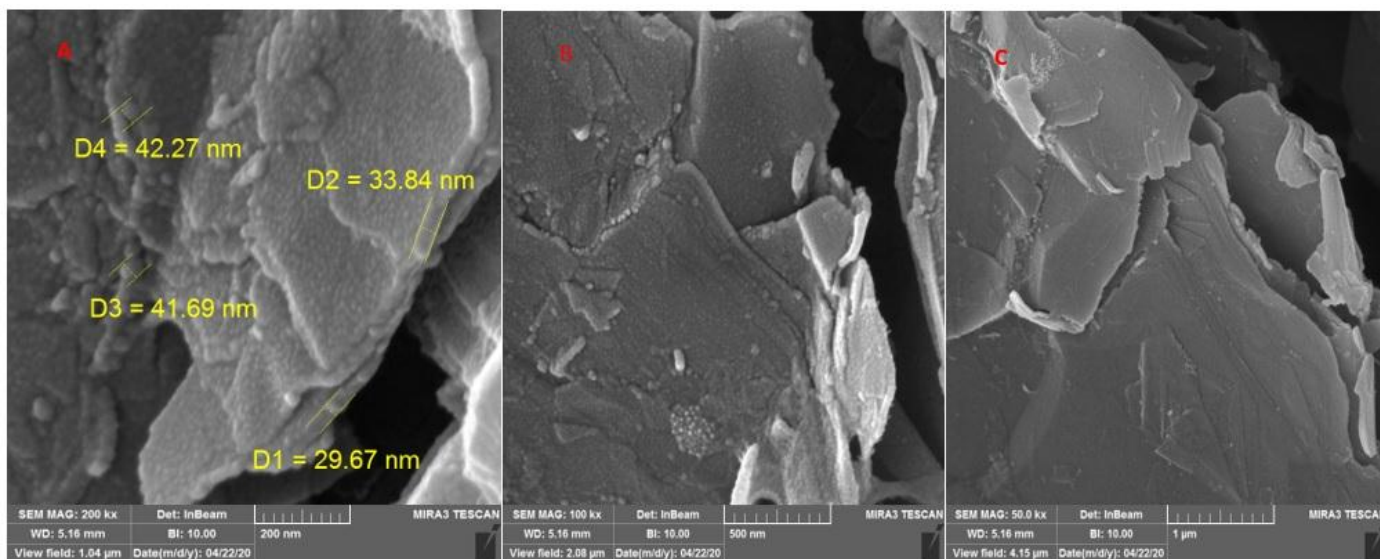

*Fig. S4. FE-SEM images of the bulk Ag NPr/GQDs nano-ink. (A to C)*

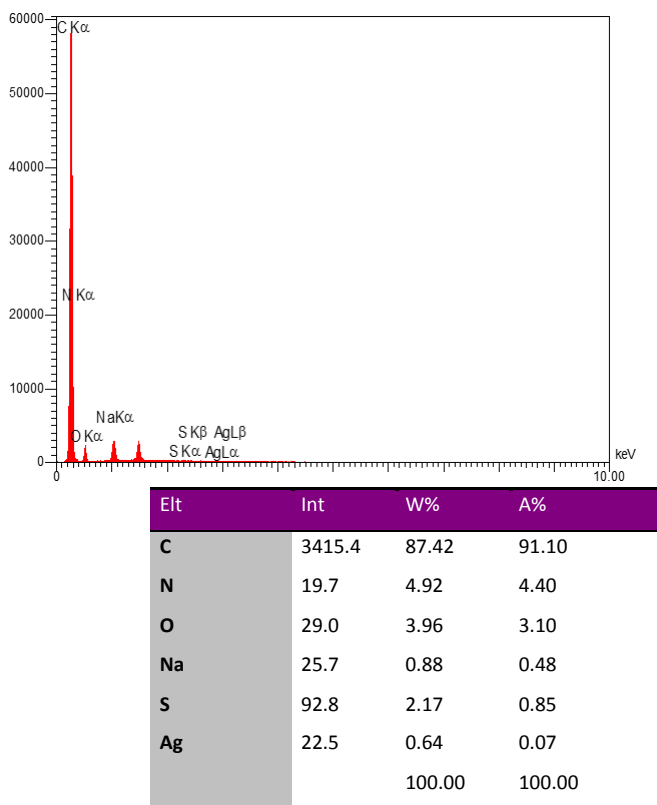

*Fig. S5. EDS spectra of bulk Ag NPr/GQDs nano-ink.*

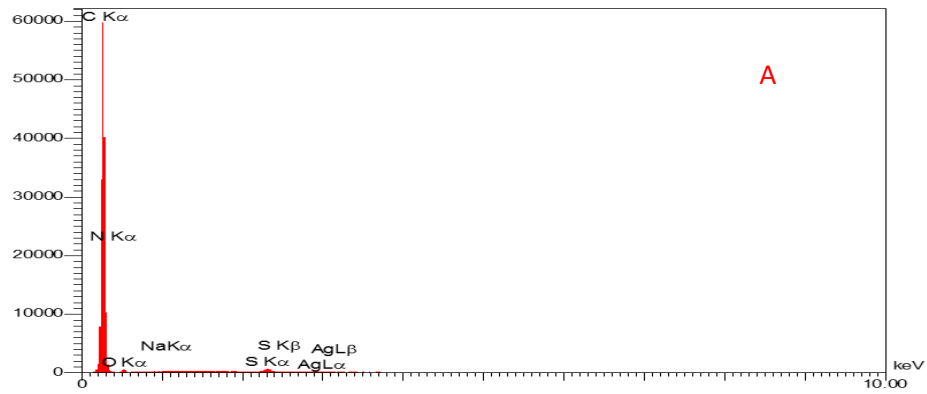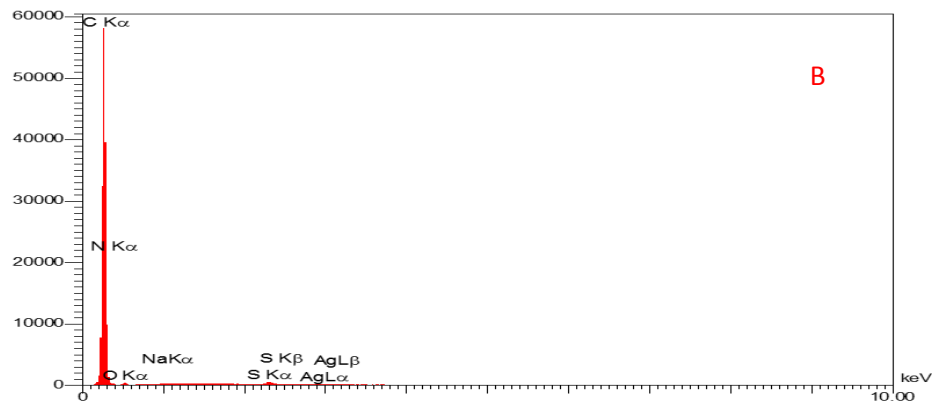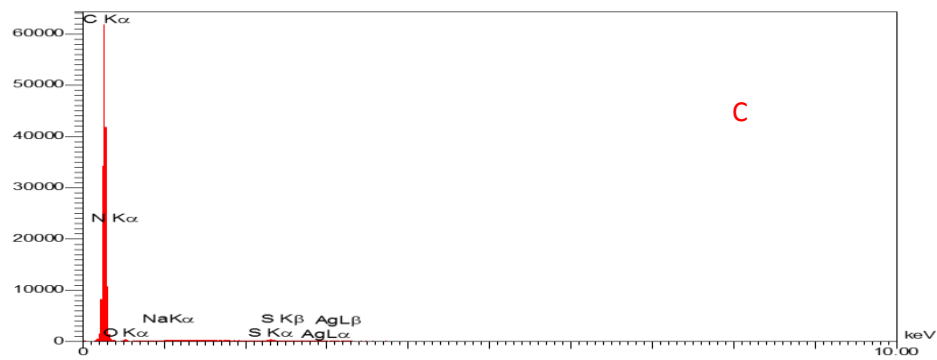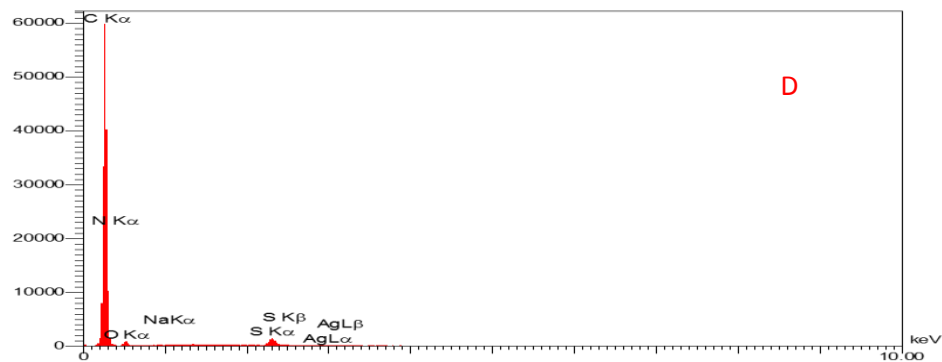

| Elt       | Int    | W%     | A%     |
|-----------|--------|--------|--------|
| <b>C</b>  | 3415.4 | 87.42  | 91.10  |
| <b>N</b>  | 19.7   | 4.92   | 4.40   |
| <b>O</b>  | 29.0   | 3.96   | 3.10   |
| <b>Na</b> | 25.7   | 0.88   | 0.48   |
| <b>S</b>  | 92.8   | 2.17   | 0.85   |
| <b>Ag</b> | 22.5   | 0.64   | 0.07   |
|           |        | 100.00 | 100.00 |

**Fig. S6.** (A)EDC images of the Ag NPr /GQDs nano-ink. (B) EDC images of the Au NPs-Cys modified Ag NRs /GQDs nano-ink. (Au NPs-Cys/ Ag NPr /GQDs nano ink), (C) EDC images of Au NPs-Cys/ Ag NPr /GQDs nano ink /p DNA(D) EDC images of Au NPs-Cys/ Ag NPr /GQDs nano ink /pDNA/MCE/TB/c DNA, deposited on the surface of paper electrode.

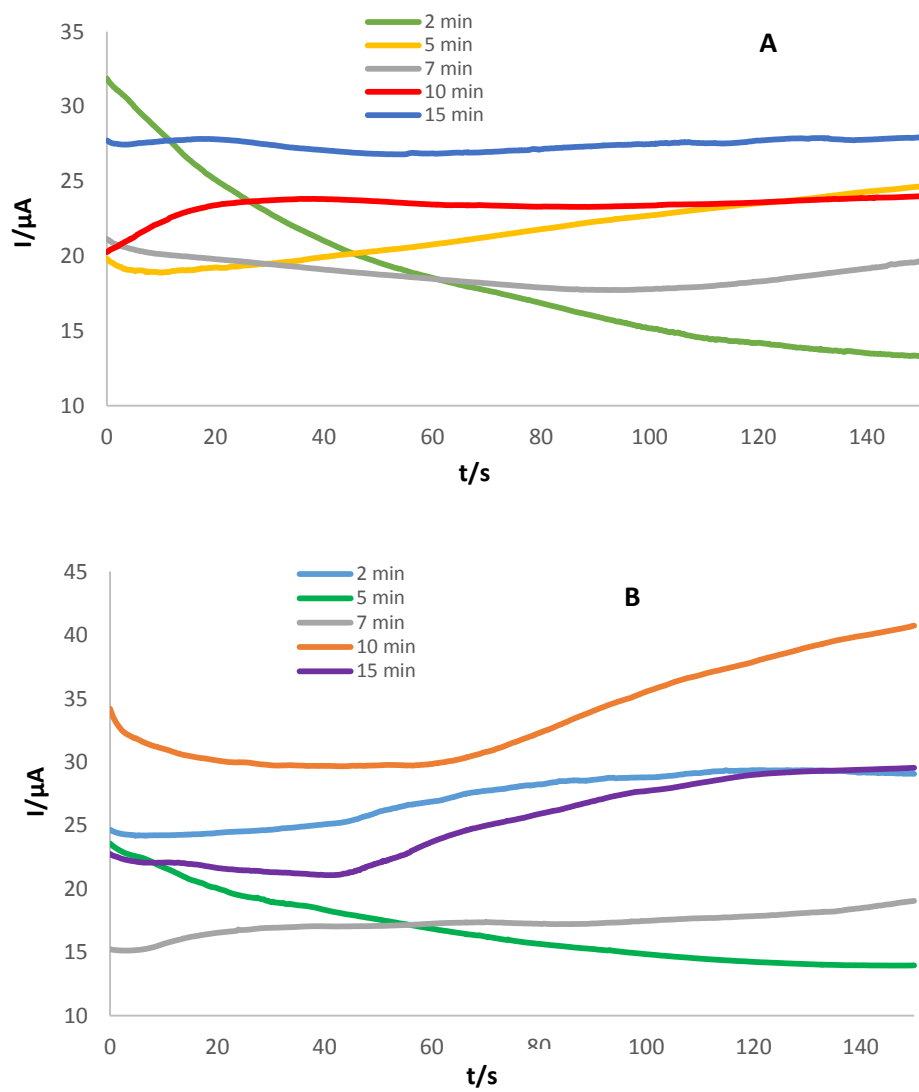

**Fig. S7.** ChAs of the biosensor after TB incubation in various times (2- 5- 7- 10-15 min): **A)** Photographic paper and **B)** Ivory sheet ( $E = 0.2$  V, duration time = 150 s, supporting electrolyte is  $[\text{Fe}(\text{CN})_6]^{3-/4-}/\text{KCl}$ ).

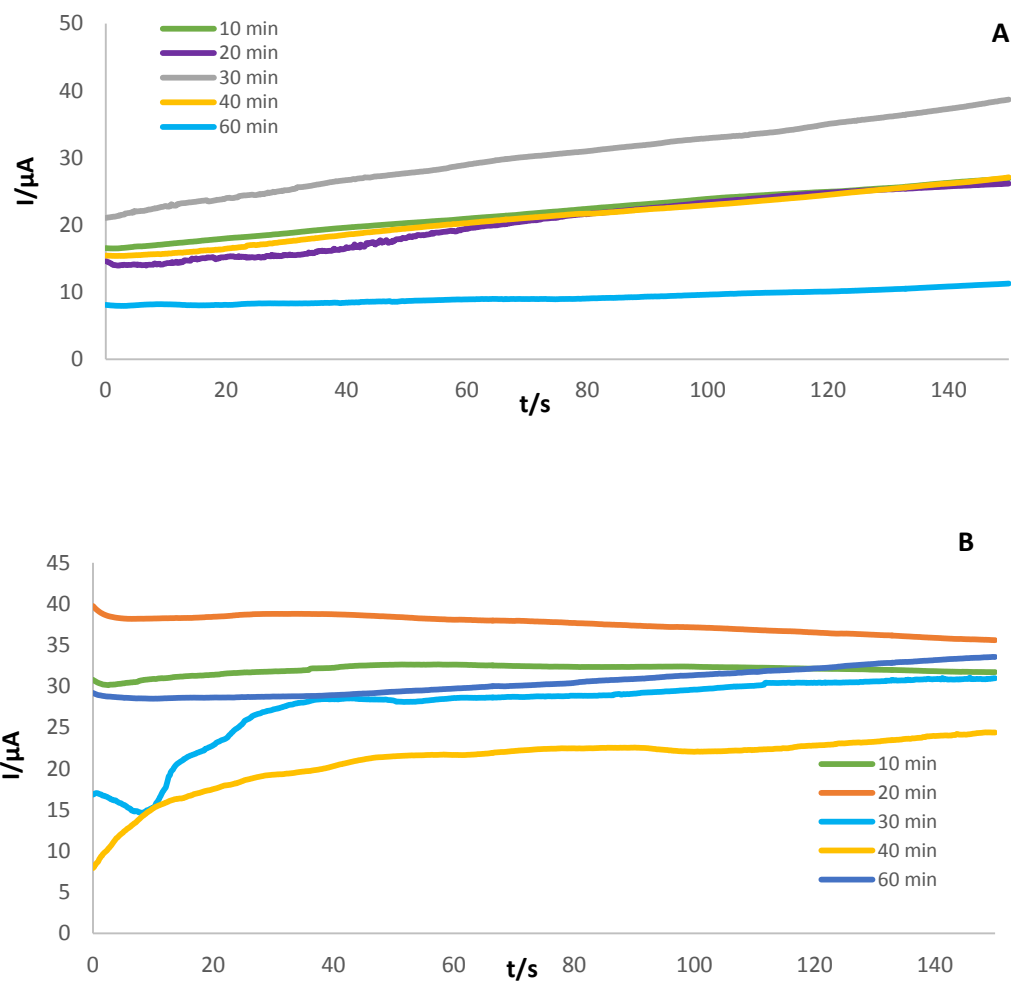

**Fig. S8.** ChAs of the biosensor after target ssDNA incubation in various times (10-20-30-40-60 min): **A)** Photographic paper and **B)** Ivory sheet ( $E= 0.2$  V, duration time= 150 s, supporting electrolyte is  $[Fe(CN)_6]^{3-/4-}/KCl$ ).



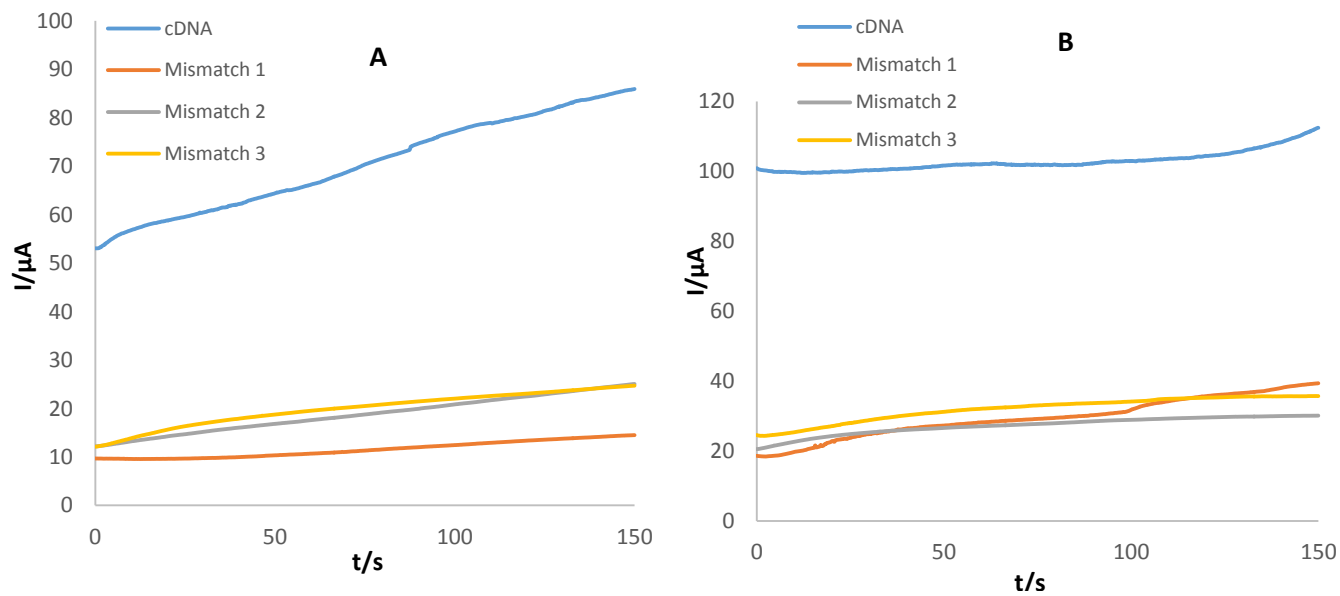

**Fig. S9.** ChAs of the engineered genosensor for hybridization by target ssDNA, one-mismatch, two mismatch and three-mismatched DNA. **A)** Photographic paper and **B)** Ivory sheet ( $E = 0.2$  V, duration time = 150 s, supporting electrolyte is  $[Fe(CN)_6]^{3-/4-}/KCl$ ).

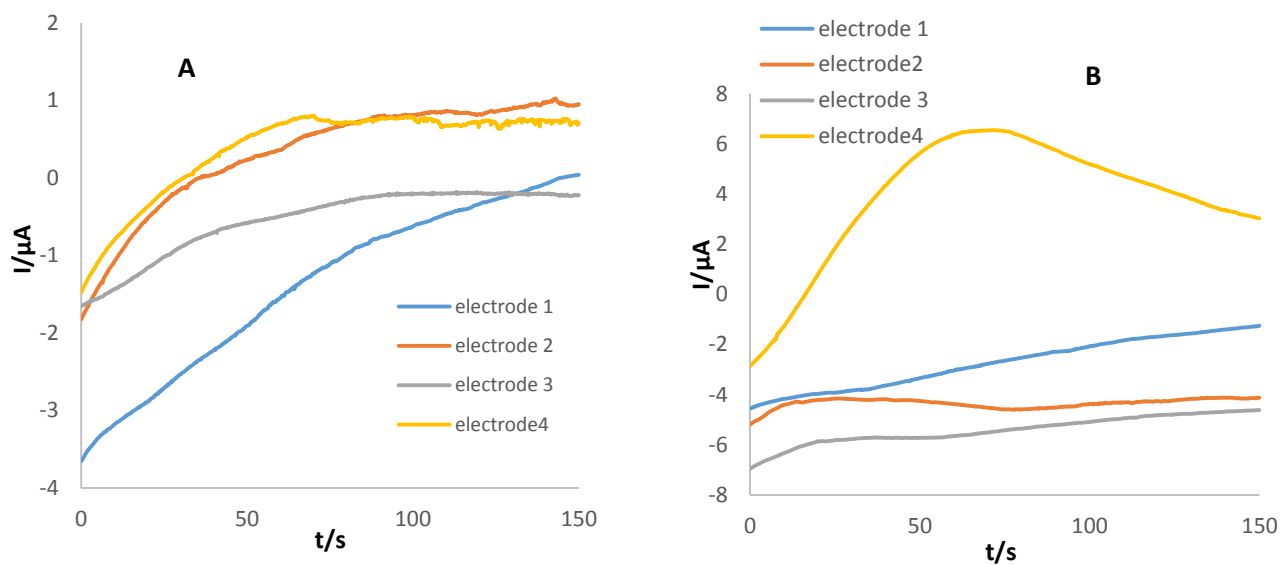

**Fig. S10.** Inter-electrode reproducibility of Au NPs-Cys/Ag NPr/GQDs nano ink/paper electrodes. **A)** Photographic paper and **B)** Ivory sheet ( $E = 0.2$  V, duration time = 150 s, supporting electrolyte is  $[\text{Fe}(\text{CN})_6]^{3-/4-}/\text{KCl}$ ).

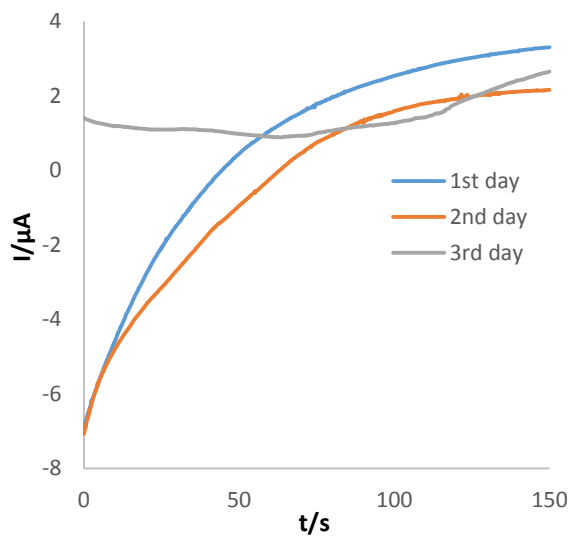

**A**

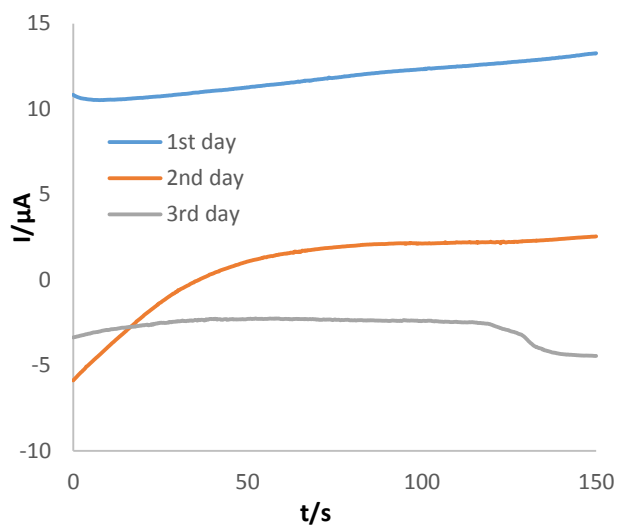

**B**

**Fig. S11.** Intraday stability of probe/Au NPs-Cys/Ag NPr/GQDs nano ink/paper electrode. **A)** Photographic paper and **B)** Ivory sheet ( $E=0.2$  V, duration time= 150 s, supporting electrolyte is  $[\text{Fe}(\text{CN})_6]^{3-/4-}/\text{KCl}$ ).

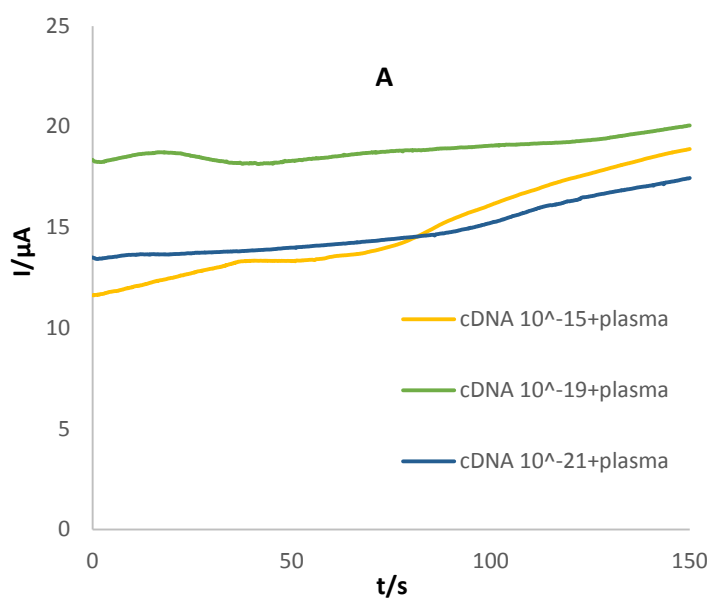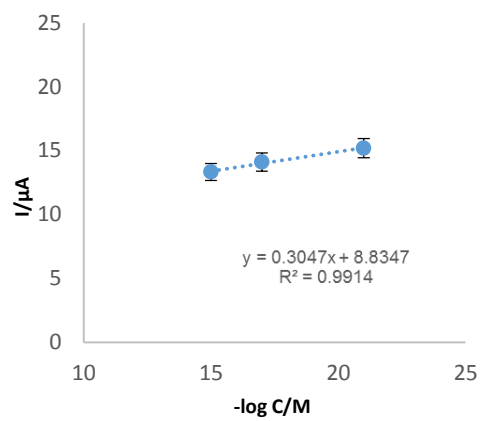

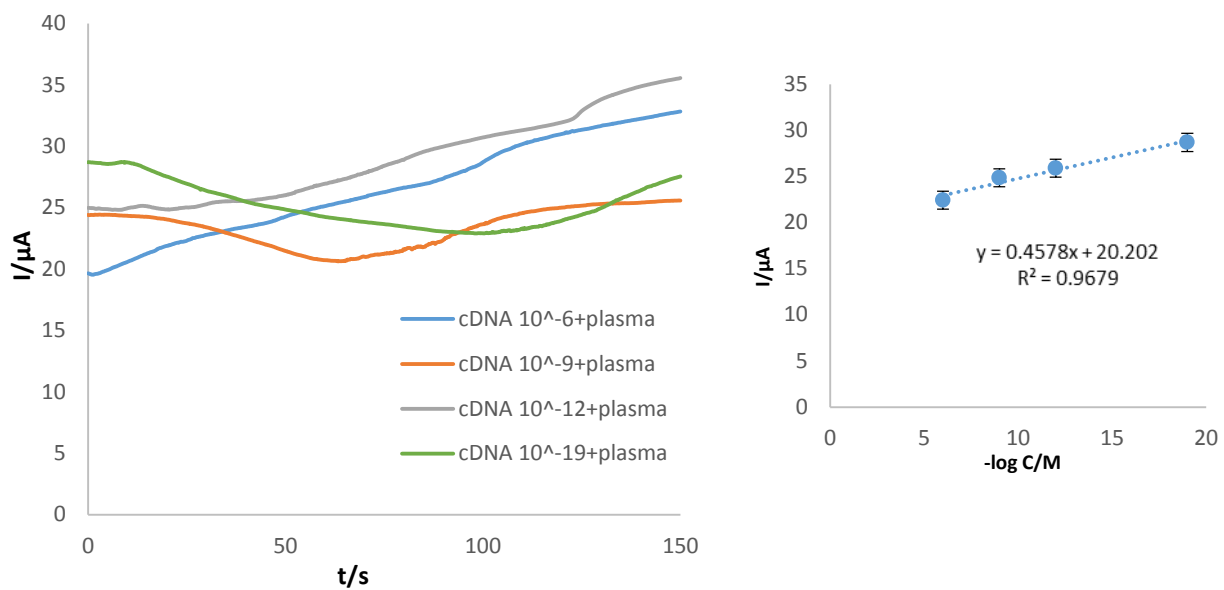

**Fig. S12.** ChAs of the proposed DNA-based biosensor in the mixture of plasma and target sequence and calibration plots **A)** Photographic paper and **B)** Ivory sheet ( $E=0.2$  V, duration time= 150s, supporting electrolyte is  $[Fe(CN)_6]^{3-/4-}/KCl$ ).
